# Supplementary material for: Sex-Specific Computational Models of Kidney Function in Patients With Diabetes
Source: Front Physiol. 2022 Jan 26;13:741121. doi: 10.3389/fphys.2022.741121 (PMC8827383; doi:10.3389/fphys.2022.741121)
Supplement: Supplementary file 1 [file Table_1.xlsx]

## Sheet: water permeability
Water Permeability (cm/s)
Compartment 1	Compartment 2		PT	S3	SDL	LDL	LAL	mTAL	cTAL	DCT	CNT	CCD	OMCD	IMCD
Lumen	Cell	Male	0.0111	0.0111	0.0111	0.0111	0	0.00165	0.00165	0.00117	0.036	0.166667	0.166667	0.0413544
		Female	0.007104	0.007104	0.0222	0.0222	0	0.00165	0.00165	0.00234	0.054	0.333333	0.333333	0.0827089
Lumen	LIS	Male	220	220	220	220	0	0.07	0.07	2	1.1	1.1	28	1.985
		Female	220	220	220	440	0	0.07	0.07	2	1.1	1.1	28	1.985
Cell	Bath	Male	0.0111	0.0111	10000	100000	1000	0.00165	0.00165	0.00835	0.44	0.33	0.22	0.0082709
		Female	0.007104	0.007104	10000	100000	1000	0.00165	0.00165	0.0167	0.66	0.66	0.44	0.0165418
Cell	LIS	Male	0.0111	0.0111	10000	0	1000	0.0017	0.0017	0.00835	0.44	0.33	0.22	0.0082709
		Female	0.007104	0.007104	10000	0	1000	0.0017	0.0017	0.00835	0.44	0.33	0.22	0.0082709
LIS	Bath	Male	330	330	10000	100000	1000	40	40	35.5	110	110	41	33.0836
		Female	330	330	10000	100000	1000	40	40	35.5	110	110	41	33.0836
Lumen	ICA	Male	0	0	0	0	0	0	0	0	0.00022	0.00022	0.00022	0
		Female	0	0	0	0	0	0	0	0	0.00033	0.00044	0.00044	0
Lumen	ICB	Male	0	0	0	0	0	0	0	0	0.00022	0.00022	0.00022	0
		Female	0	0	0	0	0	0	0	0	0.00033	0.00044	0.00044	0
ICA	LIS	Male	0	0	0	0	0	0	0	0	0.0055	0.0055	0.0055	0
		Female	0	0	0	0	0	0	0	0	0.0055	0.0055	0.0055	0
ICB	LIS	Male	0	0	0	0	0	0	0	0	0.0055	0.0055	0.0055	0
		Female	0	0	0	0	0	0	0	0	0.0055	0.0055	0.0055	0
ICA	Bath	Male	0	0	0	0	0	0	0	0	0.0055	0.0055	0.0055	0
		Female	0	0	0	0	0	0	0	0	0.00825	0.011	0.011	0
ICB	Bath	Male	0	0	0	0	0	0	0	0	0.0055	0.0055	0.0055	0
		Female	0	0	0	0	0	0	0	0	0.00825	0.011	0.011	0

## Sheet: solute permeability
Solute permeability (1e-5 cm/s)
Compartment 1	Compartment 2	Solute		PT	S3	SDL	LDL	LAL	mTAL	cTAL	DCT	CNT	CCD	OMCD	IMCD
Lumen	LIS	Na	Male	26000	26000	20	0	80	2800	3080	800	1000	1000	800	900
			Female	10400	10400	20	0	160	2520	3080	1120	1400	1200	800	990
Lumen	LIS	K	Male	29000	29000	1	0	100	3000	3300	800	1200	1200	1200	700
			Female	29000	29000	1	0	100	3000	3300	800	1200	1200	1200	700
Lumen	LIS	Cl	Male	20000	20000	20	0	80	1400	1540	500	1200	1200	1000	1600
			Female	8000	8000	20	0	160	1260	1540	700	1680	1440	1000	1760
Lumen	Cell	Na	Male	0	0	20	0	80	0	0	0.072	3	2	0	1
			Female	0	0	10	0	160	0	0	0.072	3	2	0	1.5
Lumen	Cell	K	Male	0.025	0.025	1	0	100	20	22	0.6	8	2	2	1
			Female	0.025	0.025	1	0	100	20	22	0.6	8	1.4	2.4	1.4
Lumen	Cell	Cl	Male	0	0	20	0	80	0	0	0	0.8	0.2	0	0.0002
			Female	0	0	10	0	160	0	0	0	0.8	0.2	0	0.0002

## Sheet: specific transporters
Specific activity of transporters
Compartment 1	Compartment 2	Specific transporters		PT	S3	SDL	LDL	LAL	mTAL	cTAL	DCT	CNT	CCD	OMCD	IMCD
Lumen	Cell	NHE3	Male	2.77e-08	2.77e-08				6e-09	6.6e-09	2e-07
			Female	2.2991e-08	2.2991e-08				6e-09	6.6e-09	2e-07
Lumen	Cell	HATPase	Male	5e-08	5e-08							0	0
			Female	5e-08	5e-08							0	0
Lumen	Cell	HKATPase	Male											2e-07	2e-07
			Female											2.2e-07	2.2e-07
Lumen	Cell	NKCC2	Male						1.2e-08	1.65e-08
			Female						1.44e-08	1.98e-08
Lumen	Cell	NKCC2B	Male							1.98e-08
			Female							2.376e-08
Lumen	Cell	NKCC2F	Male						7.5e-08
			Female						9e-08
Lumen	Cell	NCC	Male								1.5e-08
			Female								2.25e-08
Lumen	Cell	ENaC	Male								3.5e-08	1.4e-07	1.75e-07
			Female								7e-08	1.82e-07	2.275e-07
Cell	Bath	NAKATPase	Male	3e-07	3e-07				2.21e-06	2.145e-06	4e-07	3.41e-06	8.525e-07	4e-06	4e-06
			Female	3e-07	3e-07				2.652e-06	2.574e-06	6e-07	5.115e-06	1.023e-06	4.4e-06	4.4e-06
Cell	LIS	NAKATPase	Male	3e-07	3e-07				2.21e-06	2.145e-06	4e-07	3.41e-06	8.525e-07	4e-06	4e-06
			Female	3e-07	3e-07				2.652e-06	2.574e-06	6e-07	5.115e-06	1.023e-06	4.4e-06	4.4e-06
ICA	Bath	NAKATPase	Male									4.5e-07	1.125e-07
			Female									6.75e-07	1.35e-07
ICA	LIS	NAKATPase	Male									4.5e-07	1.125e-07
			Female									6.75e-07	1.35e-07
ICB	Bath	NAKATPase	Male									3e-07	7.5e-08
			Female									4.5e-07	9e-08
ICB	LIS	NAKATPase	Male									3e-07	7.5e-08
			Female									4.5e-07	9e-08
Cell	Bath	KCC4	Male						7e-10	7.7e-10
			Female						1.05e-09	1.155e-09
Cell	LIS	KCC4	Male						7e-10	7.7e-10
			Female						1.05e-09	1.155e-09

## Sheet: coupled transporters
Specific permeability of coupled transporters
Compartment 1	Compartment 2	Specific transporters		PT	S3	SDL	LDL	LAL	mTAL	cTAL	DCT	CNT	CCD	OMCD	IMCD
Lumen	Cell	Na-H2PO4	Male	1.25e-09	1.25e-09
			Female	9.375e-10	9.375e-10
Cell	Bath	K-Cl	Male								2e-08				2.5e-07
			Female								2e-08				3e-07
Cell	LIS	K-Cl	Male	5e-09	5e-09						2e-08				2.5e-07
			Female	5e-09	5e-09						2e-08				3e-07
Cell	Bath	Na-H	Male						1e-08	1.1e-08	4e-09	2e-08	5e-09
			Female						8e-09	8.8e-09	3.06e-09	1.8e-08	4.5e-09
Cell	LIS	Na-H	Male						1e-08	1.1e-08	4e-09	2e-08	5e-09
			Female						8e-09	8.8e-09	3.06e-09	1.8e-08	4.5e-09
ICA	Bath	Na-H	Male									3.6e-08	6e-09	6e-09
			Female									3.24e-08	5.4e-09	5.4e-09
ICA	LIS	Na-H	Male									3.6e-08	6e-09	6e-09
			Female									3.24e-08	5.4e-09	5.4e-09
ICB	Bath	Na-H	Male									2.4e-08	6e-09
			Female									2.16e-08	5.4e-09
ICB	LIS	Na-H	Male									2.4e-08	6e-09
			Female									2.16e-08	5.4e-09
Cell	Bath	Na-HPO4	Male						5e-10	5.5e-10	2e-10	2e-09	2e-09	2e-09
			Female						4e-10	4.4e-10	1.7e-10	1.8e-09	1.8e-09	1.8e-09
Cell	LIS	Na-HPO4	Male						5e-10	5.5e-10	2e-10	2e-09	2e-09	2e-09
			Female						4e-10	4.4e-10	1.7e-10	1.8e-09	1.8e-09	1.8e-09
ICA	Bath	Na-HPO4	Male									1.2e-09	8e-10	2e-10
			Female									1.08e-09	7.2e-10	1.8e-10
ICA	LIS	Na-HPO4	Male									1.2e-09	8e-10	2e-10
			Female									1.08e-09	7.2e-10	1.8e-10
ICB	Bath	Na-HPO4	Male									8e-10	8e-10	2e-10
			Female									7.2e-10	7.2e-10	1.8e-10
ICB	LIS	Na-HPO4	Male									8e-10	8e-10	2e-10
			Female									7.2e-10	7.2e-10	1.8e-10
Cell	Bath	Na-K-Cl	Male												4e-09
			Female												2.4e-09
Cell	LIS	Na-K-Cl	Male												4e-09
			Female												2.4e-09
Cell	Bath	Na-HCO3	Male	5e-09	5e-09				5e-10
			Female	5e-09	5e-09				4e-10
Cell	LIS	Na-HCO3	Male	5e-09	5e-09				5e-10	5.5e-10
			Female	5e-09	5e-09				4e-10	4.4e-10
